1 **Nasopharyngeal microbial communities of patients infected with SARS-COV-2 that**  
2 **developed COVID-19.**

3 Maria Paz Ventero<sup>1\*</sup>, Rafael Ricardo Castro Cuadrat<sup>2\*</sup>, Inmaculada Vidal<sup>1</sup>, Bruno Gabriel N.  
4 Andrade<sup>3,4</sup>, Carmen Molina-Pardines<sup>1</sup>, Jose M. Haro-Moreno<sup>5</sup>, Felipe H. Coutinho<sup>5</sup>, Esperanza  
5 Merino<sup>6</sup>, Luciana CA Regitano<sup>4</sup>, Cynthia B Silveira<sup>7</sup>, Haithem Afli<sup>4</sup>, Mario López-Pérez<sup>1,5</sup>, Juan  
6 Carlos Rodríguez<sup>1,5§</sup>.

7 <sup>1</sup>Microbiology Department, Alicante University General Hospital - Alicante Institute of  
8 Sanitary and Biomedical Research (ISABIAL), Alicante, Spain

9 <sup>2</sup>Department of Molecular Epidemiology, German Institute of Human Nutrition Potsdam-  
10 Rehbrücke, Nuthetal, Germany

11 <sup>3</sup>Embrapa Pecuária Sudeste, São Carlos, Brazil.

12 <sup>4</sup>Department of computer science, Cork Institute of Technology, Ireland.

13 <sup>5</sup>Evolutionary Genomics Group, División de Microbiología, Universidad Miguel Hernández,  
14 San Juan de Alicante, Spain.

15 <sup>6</sup>Infectious Diseases Unit, Alicante University General Hospital, Alicante Institute for Health  
16 and Biomedical Research (ISABIAL), Alicante, Spain.

17 <sup>7</sup>Department of Biology, University of Miami, Miami, USA

18

19 \* These authors contributed equally to this work

20 <sup>§</sup>Corresponding author:

21 Juan Carlos Rodríguez ([rodriguez\\_juadia@gva.es](mailto:rodriguez_juadia@gva.es))

22

23

24 Running title: Nasopharyngeal microbiome associated with COVID-19

25 **Keywords:** COVID19 / SARS-CoV-2 / Microbiome

26

27 **E-mails:**

28 Maria Paz Ventero. maripazvm@gmail.com

29 Rafael Ricardo Castro Cuadrat. rafaelcuadrat@gmail.com

30 Inmaculada Vidal. vidal\_inm@gva.es

31 Bruno Gabriel N. Andrade. bgabriel.andrade@gmail.com

32 Carmen Molina-Pardines. molina\_carpar@gva.es

33 Jose M. Haro-Moreno. moreno.jose@umh.es

34 Felipe H. Coutinho. felipehcoutinho@gmail.com

35 Esperanza Merino. merinoluc@gmail.com

36 Luciana CA Regitano. luciana.regitano@embrapa.br

37 Cynthia B Silveira. cynthiabsilveira@gmail.com

38 Haithem Afli. haithem.afli@adaptcentre.ie

39 Mario López-Pérez. mario.lopezp@umh.es

40 Juan Carlos Rodríguez. rodriguez\_juadia@gva.es

41

42 **ABSTRACT**

43 **Background:** SARS-CoV-2 is an RNA virus causing COVID-19. The clinical characteristics and  
44 epidemiology of COVID-19 have been extensively investigated, however studies focused on  
45 the patient's microbiota are still lacking. In this study, we investigated the nasopharyngeal  
46 microbiome composition of patients who developed different severity levels of COVID-19. We  
47 performed Rdna-SSU (16S) sequencing from nasopharyngeal swab samples obtained from  
48 SARS-CoV-2 positive (56) and negative (18) patients in the province of Alicante (Spain) in their

49 first visit to the hospital. Positive SARS-CoV-2 patients were observed and later categorized in  
50 mild (symptomatic without hospitalization), moderate (hospitalization) and severe  
51 (admission to ICU). We compared the microbiome diversity and OTU composition among  
52 severity groups using Similarity Percentage (SIMPER) analysis and Maaslin2. We also built  
53 bacterial co-abundance networks for each group using Fastpar.

54 **Results:** Statistical analysis indicated differences in the nasopharyngeal microbiome of  
55 COVID19 patients. 62 OTUs were found exclusively in SARS-CoV-2 positive patients, mostly  
56 classified as members of the phylum Bacteroidetes (18) and Firmicutes (25). OTUs classified  
57 as *Prevotella* were found to be significantly more abundant in patients that developed more  
58 severe COVID-19. Furthermore, co-abundance analysis indicated a loss of network complexity  
59 among samples from patients that later developed more severe symptoms.

60 **Conclusions:** Our preliminary study shows that the nasopharyngeal microbiome of COVID-19  
61 patients showed differences in the composition of specific OTUs and complexity of co-  
62 abundance networks. These microbes with differential abundances among groups could serve  
63 as biomarkers for COVID-19 severity. Nevertheless, further studies with larger sample sizes  
64 should be conducted to validate these results.

## 65 **IMPORTANCE**

66 This work has studied the microbiota of the nasopharyngeal tract in COVID19 patients using  
67 advanced techniques of molecular microbiology. Diverse microorganisms, most of which are  
68 harmless or even beneficial to the host, colonize the nasopharyngeal tract. These  
69 microorganisms are the microbiota, and they are present in every people. However, changes  
70 in this microbiota could be related to different diseases as cancer, gastrointestinal pathologies  
71 or even COVID19. This study has been performed to investigate the microbiota from patients  
72 with COVID19, in order to determinate its implication in the pathology severity. The results

73 obtained showed that it is possible that several specific microorganisms are present only in  
74 patients with severe COVID19. These data, could be used as a prognostic biomarker to early  
75 detect whose patients will develop a severe COVID19 and improve their clinical management.

## 76 **BACKGROUND**

77 Severe Acute Respiratory Syndrome Coronavirus-2 (SARS-CoV-2) is a positive-sense single-  
78 stranded RNA virus causing Coronavirus Disease 2019 (COVID-19) [1]. On January 30, 2020,  
79 the World Health Organization (WHO) declared the COVID-19 outbreak as “public health  
80 emergency of international concern” and two months later on March 11<sup>th</sup> as a pandemic. The  
81 SARS-CoV-2 virus was first reported in central city of Wuhan, Hubei province, China, and  
82 presented 70% of similarity with the SARS-CoV-1 virus [2] and 96% similarity with a bat  
83 coronavirus, which is an evidence of the original host of this zoonosis [1], although the exact  
84 source has yet to be elucidated. While the most common symptoms are fever, cough and  
85 dyspnoea, the disease can cause other less frequent clinical manifestations such as myalgia,  
86 headaches, breathlessness, fatigue and nausea [3].

87 Viruses and bacteria are often present in the respiratory tract of healthy and asymptomatic  
88 individuals [4]. Microaspiration of aerosols and direct mucosal dispersal is responsible for a  
89 constant inflow of microbes and viruses towards lower airways [4]. Disease and  
90 inflammatory processes that lead to the emergence of anaerobic zones, or mucus  
91 accumulation in the alveoli can drastically change the microbial community of the airways [4].  
92 For example, in diseased individuals, the lung microbiome composition undergoes a decrease  
93 in diversity [7] accompanied by a shift in the dominant taxa: from Bacteroidetes to  
94 Gammaproteobacteria, a class that includes many respiratory pathogens.

95 Although the clinical characteristics and epidemiology of COVID-19 have been described  
96 [8,9,10], studies focused on the associations between the patient's microbiota and the onset

97 of the disease are still limited. This pilot study aims to characterize the nasopharyngeal  
98 mucosal microbial communities of SARS-CoV-2 infected patients. We investigated samples  
99 from a control group of SARS-CoV-2 negative patients and three groups of SARS-CoV-2  
100 positive patients, divided according to disease severity: one group of symptomatic patients  
101 that did not require hospitalization, a second group of patients that were admitted to  
102 conventional hospitalization facilities, and a third group of patients that required admission  
103 to the ICU.

## 104 **METHODS**

### 105 **Patients and experimental design**

106 56 nasopharyngeal microbiome samples from SARS-CoV-2 positive patients and 18 samples  
107 from SARS-CoV-2 negative patients were collected during March and April of 2020 in the  
108 Emergency Service of Hospital General Universitario de Alicante (HGUA). Cobas SARS-CoV-2  
109 PCR Test for the Cobas 6800 System (Roche Molecular Systems, Branchburg, NJ, USA) was  
110 used to detect the presence of SARS-CoV-2 [11].

111 Patients were first classified based on SARS-CoV-2 presence, and then regarding their later  
112 developments (hospital admission and severity). All samples were obtained before the onset  
113 of severe symptoms, and before any treatment was administered to the patients. Following  
114 these criteria, four groups were established: group 0: SARS-Cov-2 negative patients (n=18);  
115 group 1: mild COVID19 symptoms but no later hospital admission (n= 19); group 2: severe  
116 COVID19 symptoms followed by hospital admission (n=18); and group 3: patients with severe  
117 COVID19 symptoms which were eventually admitted into intensive care units (ICU) (n=19).  
118 Protocols were developed in accordance with the national ethical and legal standards, and  
119 following the guidelines established in the Declaration of Helsinki (2000). The research project  
120 was conducted under the written approval of the Ethic Committee of Clinical Research with

121 Drug (In Spanish, CEIm) of the “Hospital General Universitario de Alicante (Spain)”, and in  
122 collaboration with the Biobank of Clinical and Biomedical Research Institute of Alicante  
123 (ISABIAL), which are included in the Valencian Network of Biobanks.

124

125

## 126 **DNA isolation and Sequencing**

127 DNA from nasopharyngeal samples was isolated using the QIAamp DNA Mini Kit (QIAgen)  
128 following the protocol recommended by the manufacturer. Sequencing libraries were  
129 prepared according to the 16S Metagenomic Sequencing Library Preparation protocol  
130 distributed by Illumina. Briefly, the sequence spanning the hypervariable regions V3 and V4  
131 of the 16S rRNA gene was amplified through PCR and amplicons were quantified using a Qubit  
132 4 Fluorometer (Qubit dsDNA HS Assay Kit) and validated by 4200 TapeStation (company).  
133 Amplicons were sequenced with Illumina MiSeq System using the 2x300bp cartridge. The  
134 quality of raw sequences was assessed by FastQC software.

## 135 **Taxonomic classification of amplicon sequences**

136 Paired end reads of 300 bp were generated with an average overlap of 140 bp. Sequences  
137 were trimmed using trimmomatic [12] and the resulting paired reads were merged using  
138 casper [13], generating individual fragments of about 460 bp. Given the uneven coverage  
139 between samples, the number of individual reads was standardized to 20,000 per sample,  
140 removing samples that did not reach this sequencing depth. Merged amplicon sequences  
141 were grouped in operational taxonomic units (OTUs) using cd-hit [14] with an identity of 97%.  
142 Sequences were queried against small subunits (16S) rRNA genes by the SILVA database [15]  
143 for taxonomic classification. Sequences with low identity (< 70%) to any reference 16S rRNA  
144 gene or classified as eukaryotic were excluded from further analysis.

## 145 **Testing for differences in taxonomic composition among patient groups**

146 We sought to determine how different samples were grouped according to their OTU  
147 composition. To that end, non-metric multidimensional scaling (NMDS) analysis was  
148 performed based on Bray-Curtis dissimilarity measures were calculated among samples based  
149 on relative OTU abundances (i.e. percentages) through the Vegan (v 2.5-6) package in R (v  
150 3.6.3). The relative abundances of OTUs were also used to test for statistically significant  
151 differences among severity groups. Group OTU compositions were compared through  
152 ANOSIM. Next, Similarity Percentage (SIMPER) analysis was used to determine which OTUs  
153 were responsible for driving the differences in community composition among groups. For  
154 this analysis, all six possible pairwise combinations of severity groups were tested.

## 155 **OTU association with COVID-19 severity**

156 To infer associations between the severity of COVID-19 and the airways microbiome, general  
157 linear models (GLM) were built using the R package MaAsLin2 with centred log-transformed  
158 (CLR) OTUs counts as the dependent variable and the severity group (with group 0 and group  
159 1 as references), adjusted by gender and age, as the independent variable. Only OTUs that  
160 presented a prevalence of 20% over the sample space were considered. The resulting p-values  
161 were adjusted for multiple testing using the Benjamini-Hochberg method (BH).

## 162 **Co-abundance networks for COVID-19 severity groups**

163 Fastpar [16], a multi-thread implementation of the SparCC algorithm [17], was used to  
164 generate co-abundance networks among OTUs of each of the four severity groups with  
165 default parameters (50 iterations and correlation threshold of 0.2) and 1,000 bootstrap  
166 iterations to infer significance. Results were processed using an in-house ipython notebook  
167 to generate network matrices for visualization with Cytoscape 3.8 [18]. The network matrices

168 were loaded in the Cytoscape 3.8 software, and connections filtered by p-value ( $\leq 0.05$ ) and  
169 correlation ( $\leq -0.6$  or  $\geq 0.6$ ).

170

## 171 **RESULTS**

### 172 **Study Set**

173 Seventy-four patients were included in this pilot study to assess associations between the  
174 nasopharyngeal microbiome composition and the severity of the COVID19 disease. However,  
175 only 65 samples remained after quality coverage control (see Material and Methods). Data  
176 including age, sex, diagnosis, hospital admission, and disease severity were registered (Table  
177 S1). Sixteen patients belonged to the negative control (Group 0, no-SARS-CoV-2), whereas the  
178 remaining patients were classified into three groups (Group 1, 2 and 3) according to the  
179 severity (see methods). The average age of the patients was *ca.* 60 years old and around 49%  
180 of them were diagnosed with pneumonia.

### 181 **Microbiome taxonomic composition differs among severity groups**

182 The bacterial phylum Firmicutes was the most abundant in the nasopharynx microbiome  
183 among patients from all severity groups ( $52.94\% \pm 4.04\%$ ), followed by Bacteroidota ( $22.06\%$   
184  $\pm 6.07\%$ ), Proteobacteria ( $12.75\% \pm 7.28\%$ ) and Actinobacteria ( $5.4\% \pm 0.6\%$ ). At the genus  
185 level, *Streptococcus* was the most abundant taxon ( $25.23\% \pm 2.03\%$ ), followed by *Prevotella*  
186 ( $16.20\% \pm 5.66\%$ ), *Veillonella* ( $14.45\% \pm 2.20\%$ ), *Haemophilus* ( $5.28\% \pm 4.76\%$ ) and *Moraxella*  
187 ( $3.24\% \pm 3.6\%$ ) (Figure S1 and Table S2). A total of 62 OTUs were found exclusively in SARS-  
188 CoV-2 positive patients (at a minimum of three samples). Most of these OTUs were classified  
189 as members of the phylum Bacteroidetes (18) and Firmicutes (25). Notably, the most common  
190 genera among the OTUs found exclusively on COVID-19 positive patients were *Prevotella* (13),  
191 followed by *Leptotrichia* (4) and *Streptococcus* (4). Samples were compared based on the



192 relative abundances of OTUs. This analysis revealed that samples did not cluster according to  
193 the severity group neither by hierarchical clustering (Figure S2A and 2B) or NMDS (Figure S2C).  
194 Nevertheless, the differences in OTU composition among severity groups were significant  
195 according to ANOSIM ( $R = 0.046$ ,  $p = 0.036$ ).

196 SIMPER analysis revealed that 25 OTUs were responsible for approximately 70% (p-value  
197 0.04) of the differences in community composition between severity groups 1 and 3 (Table  
198 S3). These OTUs were classified as members of the phyla Bacteroidota, Firmicutes,  
199 Fusobacteriota and Proteobacteria. Eleven OTUs had higher average abundance among  
200 samples from severity group 1, among which were included three OTUs classified as members  
201 of the genus *Veillonella*. On the other hand, 14 OTUs were more abundant among samples  
202 from severity group 3, among which were included four OTUs classified as *Prevotella*.

### 203 **Multiple OTUs display differential abundance according to COVID-19 severity**

204 Using group 0 as a reference, we identified a total of 10 significant associations between  
205 bacterial OTUs and patient severity (p-value < 0.05, q-value < 0.25), corrected for age and sex.  
206 Among those, 9 were positively associated (8 in group 2 and 1 in group 3 when contrasted  
207 with group 0) and 1 negatively associated (in group 3 contrasted with group 0) (Table S4,  
208 Figure 1A). Of the OTUs positively associated with severity, 3 were classified as members of  
209 the genus *Prevotella* (OTUs 4, 14 and 16). Due to the heterogeneity of group 0, we decided to  
210 investigate also the differences within the SARS-CoV-2 positive patients, using group 1 as  
211 reference. The GLM model showed just 1 significant OTU (OTU 16), a *Prevotella* also found to  
212 be significantly associated with severity in the first model (Table S4, Figure 1B). We did not  
213 find any OTUs significantly different between groups 1 and 0. Figure 1A shows the coefficients  
214 for all the significant OTUs found by both GLMs and figure 1B shows OTU 16 CLR transformed  
215 counts for all severity groups.

## 216 **Co-abundance networks for COVID-19 severity groups**

217 In order to investigate how OTUs correlate in the different groups, we generated a total of 4  
218 co-abundance networks, one for each severity group. For the severity group 0, the SARS-CoV-  
219 2 negative group, the network displayed 118 nodes with 179 edges. Regarding the other three  
220 severity groups, ranging from mild to high severity, the complexity of the network decreased  
221 with the increase of severity. The network for patients with mild symptoms (group 1) has 137  
222 nodes with 457 edges, while the network for patients with severe symptoms but not admitted  
223 in ICU (group 2) had 129 nodes with 171 edges and the network for severe patients admitted  
224 in ICU (group 3) had 100 nodes and 148 edges. In the network of severity group 1, OTU 16  
225 (*Prevotella*, associated with severity in two GLMs) displayed 18 co-abundant OTUs connected  
226 in the network in first degree (Figure 2). Among these connections, ten were negative  
227 associations while eight were positive. Most of these connections with OTU 16 were absent  
228 from networks of severity groups 2 and 3. Only 3 and 2 first degree connections remained in  
229 each of these networks respectively (Figure S3).

230

## 231 **DISCUSSION**

232 In this preliminary study, analysis of the taxonomic composition of the samples showed  
233 differences between patients that developed different onsets of COVID-19. These changes in  
234 nasopharyngeal community composition are subtle, meaning that they are restricted to few  
235 taxa out of the complete meta-community. Nevertheless, there are detectable and significant  
236 changes among OTU abundances. These changes could be linked to the different severity  
237 groups, as we identified both taxa that were present exclusively among COVID-19 positive  
238 patients as well as those whose abundance was significantly higher or lower among different  
239 severity groups. Not only this, but also the complexity of co-abundance networks (which can

240 be taken as a proxy for potential interactions between taxa), was decreased among patients  
241 that developed more severe cases of COVID-19. Below we discuss the mechanisms by which  
242 specific microbes might play a role in either enhancing or decreasing the severity of COVID-  
243 19. Those results suggest potential biomarkers for the onset of the disease.

#### 244 **Potential associations between bacterial taxa and COVID-19 severity.**

245 Among the OTUs positively associated with COVID-19 severity, three were classified as  
246 members of the genus *Prevotella*, and one to a closely related genus, *Alloprevotella*. A recent  
247 study showed that *Prevotella* proteins can promote viral infection through multiple  
248 interactions with NF- $\kappa$ B signalling pathway, which is also involved in COVID-19 severity [19].  
249 The genus *Prevotella* is usually considered commensal and, as such, rarely involved in  
250 infections. However, some strains have been identified as opportunistic pathogens in chronic  
251 infections, abscesses and anaerobic pneumonia [20,21,22,23]. The role of some strains of  
252 *Prevotella* in chronic mucosal inflammation has been demonstrated. They are involved with  
253 augmented T helper type 17 (Th17)-mediated mucosal inflammation, through activation of  
254 Toll-like receptor 2, followed by production of cytokines by antigen-presenting cells, including  
255 interleukin-23 (IL-23) and IL-1 [23]. The severe symptoms of COVID-19 are associated with  
256 cytokine storms, many of which are involved in TH17 type responses [24]. The significant  
257 association of *Prevotella* sp. and disease severity observed here suggests a possible link  
258 between *Prevotella* sp. and the COVID-19 through the activation of immunity signaling  
259 pathways that modulate inflammation, and this link should be further explored.

260

#### 261 **Reduced network complexity among patients who later developed more severe COVID-19.**

262 Several studies demonstrated the usefulness of co-abundance networks to elucidate changes  
263 in the microbiome associated with human diseases [26,27,28,29]. By switching from

264 individual OTU associations to a community interaction approach it is possible to attain a  
265 better understanding of the dynamic of microbiome/phenotype associations, revealing  
266 microbial consortia (and not only an OTU) that might be collectively influencing the host  
267 phenotype. Our linear models showed OTU 16 (*Prevotella* sp.) as an important OTU associated  
268 with severity. This OTU had the highest number of connections in the network, followed by  
269 OTU 9 (*Veillonella* sp.). Of the four networks generated, the severity group 1 network showed  
270 the higher number of interactions with this OTU. Ecological networking, *in vitro* and clinical  
271 studies showed that *Prevotella* sp. and *Veillonella* sp. are keystone species in microbiomes  
272 during airway disease progression, especially in diseases associated with mucus accumulation  
273 such as cystic fibrosis [30-32]. These anaerobes are efficient at degrading mucin molecules on  
274 the airway mucosa, releasing byproducts that enable the colonization and growth of  
275 pathogenic bacteria that are poor at degrading mucus for growth [33]. In COVID patients,  
276 *Prevotella* sp. and *Veillonella* sp. could have a similar role due to the decreased mucociliary  
277 clearance caused by the viral infection [34]. Lower rates of clearing increase the residence  
278 time of *Prevotella* sp. and *Veillonella* sp. in the airways, likely increasing their mucus  
279 metabolism and enabling further colonization by pathogenic bacteria that may cause  
280 pneumonia.

281 OTU 96, classified as *Dolosigranulum* sp., was identified in the group 1 network by having a  
282 negative relationship with OTU 16 (*Prevotella* sp.) as first-degree neighbor (Figure 3). OTU 96  
283 did not pass the q-value threshold established for the GLMs but shows significant p-value  
284 (0.003 in the model comparing group 2 and group 0, and 0.02 in the model comparing group  
285 2 and group 1 as reference). The only species currently described in this genus is  
286 *Dolosigranulum pigrum*, which is commonly found in the nasopharynx microbiome and is  
287 predicted to benefit the host through protection against pneumococcal colonization [35-36]

288 and through protection against inflammation damage [37]. One study also found a lower  
289 abundance of *Dolosigranulum* in children with Influenza A Virus compared to healthy children  
290 [38]. In addition, a study reported that patients with their airway microbiota dominated by  
291 *Corynebacterium* and *Dolosigranulum* experienced the lowest rates of early loss of asthma  
292 control and have a longer time to develop at least 2 episodes [39]. We did not identify  
293 *Corynebacterium* directly connected to OTU16 (*Prevotella* sp.), but OTU 78, classified as  
294 *Corynebacterium* is positively associated with OTU 96 (0.7479, p-value 0.001) in the co-  
295 abundance network from group 1 (Figure 3), indicating that in asymptomatic patients those  
296 two taxa are forming a consortium that might protect from disease development. This  
297 “consortium” was also implicated in resistance to recurrent ear infections and it was proposed  
298 as a probiotic candidate for upper respiratory tract infections [40]. The reason that we did not  
299 have lower q-value in our GLM for those two taxa could be the lack of power due to the small  
300 size of our study. Thus, these associations warrant further investigation.

301

## 302 **LIMITATIONS**

303 The major limitation of our study is the small sample size. With only about 15 samples per  
304 severity group it is difficult to find statistically significant associations between microbiome  
305 composition and disease severity. Nevertheless, this limitation is more likely to lead to false  
306 negatives than to false positives. We also cannot rule out confounding factors that might  
307 explain the differences between groups. Another important limitation is the fact that we  
308 performed amplicon rather than whole genome shotgun sequencing. This leads to three  
309 issues. First, some of the bacterial diversity is lost due to the fact that the selected primers do  
310 not amplify the entirety of bacterial diversity. Second, some genomes have more than a single  
311 copy of the 16S operon, which can lead to an overestimation of their abundance in the

312 samples. Third, without metagenomes (and metagenome assembled genomes) we could not  
313 make inferences about the presence of virulence factors and other features of the genomes  
314 of the microbes in our samples. We resorted to 16S amplification because our non-invasive  
315 approach to collect samples yields low DNA amounts that are inadequate for sequencing.  
316 However, as far as we know, this is a unique pilot study in the field. The aim is to be able to  
317 transfer the first useful results to help clinical practice in the fight against the virus and to  
318 optimize all the protocols and analyses for a second analysis in which the sample size will be  
319 much larger. We are currently working on collecting more samples and optimizing protocols  
320 that will allow us to obtain whole genome shotgun sequencing from them.

321

## 322 **CONCLUSION**

323 Our data provides preliminary evidence of significant differences in the composition of the  
324 upper airway microbiome according to COVID-19 severity, suggesting potential biomarkers of  
325 disease severity. While the richness indexes did not show significant differences among  
326 groups, specific taxa were significantly associated with disease development. We also  
327 demonstrated that the complexity of the co-abundance network is decreased in patients who  
328 came to develop severe cases of the disease, indicating that the interactions between the  
329 taxa are also relevant to this process. Further studies will be necessary to shed light on the  
330 molecular mechanisms that give rise to these associations. Finally, we make no claim that the  
331 differences in microbiome composition reported here are the cause of of COVID-19 severity.  
332 Nevertheless, the significant associations found between these variables suggests that the  
333 role of the microbiome on the onset of disease severity warrants further investigation.

334

## 335 **DECLARATIONS**

336 **Ethics approval and consent to participate**

337 This study has the written approval of the Ethic Committee of Clinical Research of Alicante  
338 University General Hospital (Ref. CEIm: PI2020-052). The samples used in this work are from  
339 clinical nasopharyngeal aspirates used to diagnose the COVID19 pathology during the first  
340 emergency state in Spain and stored in the Alicante University General Hospital Biobank. In  
341 this period, it was allowed to collect samples by Biobanks without obtaining the Informed  
342 Consent (Dictamen COVID19 D.20200327/2 CEI DGSP-CSISP).

343 **Consent for publication**

344 Not applicable

345 **Availability of data and materials**

346 Raw data was deposited to the National Center for Biotechnology Information Sequence Read  
347 Archive under BioProject accession number PRJNA673585.  
348 All data generated during this study are included in this published article [and its  
349 supplementary information files].

350 **Competing interests**

351 The authors declare that they have no competing interests.

352 **Funding**

353 This work was supported by a grant from Instituto de Salud Carlos III (ISCIII; grant number  
354 COV20/00236).

355 **Authors' contributions**

356 JCR conceived the study. MPV, IV, CM and EM collected the data. RC, BA, CS, JHN and FH  
357 analysed the data. MPV, RC, MLP, FH, BA and JCR wrote the paper. All authors reviewed and  
358 approved the final version of the manuscript.

359 **Acknowledgments**

360 Not applicable

361

362 **REFERENCES**

363

364 1. Andersen KG, Rambaut A, Lipkin WI, Holmes EC, Garry RF. The proximal origin of SARS-CoV-

365 2. Nat Med. 2020;26:450–2.

366 2. Zhu N, Zhang D, Wang W, Li X, Yang B, Song J, et al. A Novel Coronavirus from Patients with

367 Pneumonia in China, 2019. N Engl J Med. 2020;382:727–33.

368 3. Guan W, Ni Z, Hu Y, Liang W, Ou C, He J, et al. Clinical Characteristics of Coronavirus Disease

369 2019 in China. N Engl J Med. 2020;382:1708–20.

370 4. Huffnagle GB, Dickson RP, Lukacs NW. The respiratory tract microbiome and lung

371 inflammation: a two-way street. Mucosal Immunol. 2017;10:299–306.

372 5. Kostric M, Milger K, Krauss-Etschmann S, Engel M, Vestergaard G, Schloter M, et al.

373 Development of a Stable Lung Microbiome in Healthy Neonatal Mice. Microb Ecol.

374 2018;75:529–42.

375 6. Dickson RP, Erb-Downward JR, Freeman CM, McCloskey L, Falkowski NR, Huffnagle GB, et

376 al. Bacterial Topography of the Healthy Human Lower Respiratory Tract. Clemente JC, editor.

377 mBio. 2017;8:e02287-16, /mbio/8/1/e02287-16.atom.

378 7. Kalantar KL, Moazed F, Christenson SC, Wilson J, Deiss T, Belzer A, et al. Metagenomic

379 comparison of tracheal aspirate and mini-bronchial alveolar lavage for assessment of

380 respiratory microbiota. American Journal of Physiology-Lung Cellular and Molecular

381 Physiology. 2019;316:L578–84.

382 8. Rothan HA, Byrareddy SN. The epidemiology and pathogenesis of coronavirus disease

383 (COVID-19) outbreak. Journal of Autoimmunity. 2020;109:102433.



- 384 9. Wu F, Zhao S, Yu B, Chen Y-M, Wang W, Song Z-G, et al. A new coronavirus associated with  
385 human respiratory disease in China. *Nature*. 2020;579:265–9.
- 386 10. Chen N, Zhou M, Dong X, Qu J, Gong F, Han Y, et al. Epidemiological and clinical  
387 characteristics of 99 cases of 2019 novel coronavirus pneumonia in Wuhan, China: a  
388 descriptive study. *The Lancet*. 2020;395:507–13.
- 389 11. Poljak M, Korva M, Knap Gašper N, Fujs Komloš K, Sagadin M, Uršič T, et al. Clinical  
390 Evaluation of the cobas SARS-CoV-2 Test and a Diagnostic Platform Switch during 48 Hours in  
391 the Midst of the COVID-19 Pandemic. McAdam AJ, editor. *J Clin Microbiol*. 2020;58:e00599-  
392 20, /jcm/58/6/JCM.00599-20.atom.
- 393 12. Bolger AM, Lohse M, Usadel B. Trimmomatic: a flexible trimmer for Illumina sequence  
394 data. *Bioinformatics*. 2014;30:2114–20.
- 395 13. Kwon S, Lee B, Yoon S. CASPER: context-aware scheme for paired-end reads from high-  
396 throughput amplicon sequencing. *BMC Bioinformatics*. 2014;15:S10.
- 397 14. Fu L, Niu B, Zhu Z, Wu S, Li W. CD-HIT: accelerated for clustering the next-generation  
398 sequencing data. *Bioinformatics*. 2012;28:3150–2.
- 399 15. Quast C, Pruesse E, Yilmaz P, Gerken J, Schweer T, Yarza P, Peplies J, Glöckner FO. The  
400 SILVA ribosomal RNA gene database project: improved data processing and web-based  
401 tools. *Nucl. Acids Res*. 41 (D1): D590-D596. 2013
- 402 16. Watts SC, Ritchie SC, Inouye M, Holt KE. FastSpar: rapid and scalable correlation  
403 estimation for compositional data. Stegle O, editor. *Bioinformatics*. 2019;35:1064–6.
- 404 17. Friedman J, Alm EJ. Inferring Correlation Networks from Genomic Survey Data. von Mering  
405 C, editor. *PLoS Comput Biol*. 2012;8:e1002687.
- 406 18. Shannon P. Cytoscape: A Software Environment for Integrated Models of Biomolecular  
407 Interaction Networks. *Genome Research*. 2003;13:2498–504.

- 408 19. Khan AA, Khan Z. COVID-2019-associated overexpressed *Prevotella* proteins mediated  
409 host–pathogen interactions and their role in coronavirus outbreak. Elofsson A, editor.  
410 Bioinformatics. 2020;36:4065–9.
- 411 20. Nagy E. Anaerobic Infections: Update on Treatment Considerations. *Drugs*. 2010;70:841–  
412 58.
- 413 21. Brook I. Anaerobic Pulmonary Infections in Children: Pediatric Emergency Care.  
414 2004;20:636–40.
- 415 22. Brook I. MICROBIOLOGY OF COMMON INFECTIONS IN THE UPPER RESPIRATORY TRACT.  
416 Primary Care: Clinics in Office Practice. 1998;25:633–48.
- 417 23. Larsen JM. The immune response to *Prevotella* bacteria in chronic inflammatory disease.  
418 Immunology. 2017;151:363–74.
- 419 24. Wu D, Yang XO. TH17 responses in cytokine storm of COVID-19: An emerging target of  
420 JAK2 inhibitor Fedratinib. *Journal of Microbiology, Immunology and Infection*. 2020;53:368–  
421 70.
- 422 25. de Carvalho Baptista IM, Martinho FC, Nascimento GG, da Rocha Santos CE, Prado RF do,  
423 Valera MC. Colonization of oropharynx and lower respiratory tract in critical patients: Risk of  
424 ventilator-associated pneumonia. *Archives of Oral Biology*. 2018;85:64–9.
- 425 26. Chen L, Collij V, Jaeger M, van den Munckhof ICL, Vich Vila A, Kurilshikov A, et al. Gut  
426 microbial co-abundance networks show specificity in inflammatory bowel disease and  
427 obesity. *Nat Commun*. 2020;11:4018.
- 428 27. Wang H, Li Y, Feng X, Li Y, Wang W, Qiu C, et al. Dysfunctional gut microbiota and relative  
429 co-abundance network in infantile eczema. *Gut Pathog*. 2016;8:36.

- 430 28. Faust K, Sathirapongsasuti JF, Izard J, Segata N, Gevers D, Raes J, et al. Microbial Co-  
431 occurrence Relationships in the Human Microbiome. Ouzounis CA, editor. PLoS Comput Biol.  
432 2012;8:e1002606.
- 433 29. Greenblum S, Turnbaugh PJ, Borenstein E. Metagenomic systems biology of the human  
434 gut microbiome reveals topological shifts associated with obesity and inflammatory bowel  
435 disease. Proceedings of the National Academy of Sciences. 2012;109:594–9.
- 436 30. Silveira, Cynthia, Ana Georgina Cobian-Guemes, Carla Uranga, Jonathon Baker, Anna  
437 Edlund, Forest Rohwer, and Douglas Conrad. "Multi-omics study of keystone species in the  
438 cystic fibrosis lung microbiome." (2020).
- 439 31. Quinn, Robert A., Katrine Whiteson, Yan Wei Lim, Jiangchao Zhao, Douglas Conrad, John  
440 J. LiPuma, Forest Rohwer, and Stefanie Widder. "Ecological networking of cystic fibrosis lung  
441 infections." *NPJ biofilms and microbiomes* 2, no. 1 (2016): 1-11.
- 442 32. Flynn, Jeffrey M., David Niccum, Jordan M. Dunitz, and Ryan C. Hunter. "Evidence and role  
443 for bacterial mucin degradation in cystic fibrosis airway disease." *PLoS pathogens* 12, no. 8  
444 (2016): e1005846.
- 445 33. Flynn, Jeffrey M., Lydia C. Cameron, Talia D. Wiggen, Jordan M. Dunitz, William R.  
446 Harcombe, and Ryan C. Hunter. "Disruption of Cross-Feeding Inhibits Pathogen Growth in the  
447 Sputa of Patients with Cystic Fibrosis." *mSphere* 5, no. 2 (2020).
- 448 34. Robinot, Rémy, Mathieu Hubert, Guilherme Dias de Melo, Françoise Lazarini, Timothée  
449 Bruel, Nikaïa Smith, Sylvain Levallois et al. "SARS-CoV-2 infection damages airway motile cilia  
450 and impairs mucociliary clearance." *bioRxiv* (2020).
- 451 35. Biesbroek G, Bosch AATM, Wang X, Keijser BJB, Veenhoven RH, Sanders EAM, et al. The  
452 Impact of Breastfeeding on Nasopharyngeal Microbial Communities in Infants. *Am J Respir*  
453 *Crit Care Med*. 2014;140612135546007.

- 454 36. Bomar L, Brugger SD, Yost BH, Davies SS, Lemon KP. *Corynebacterium accolens* Releases  
455 Antipneumococcal Free Fatty Acids from Human Nostril and Skin Surface Triacylglycerols.  
456 *mBio*. 2016;7:e01725-15, /mbio/7/1/e01725-15.atom.
- 457 37. Ortiz Moyano R, Raya Tonetti F, Tomokiyo M, Kanmani P, Vizoso-Pinto MG, Kim H, et al.  
458 The Ability of Respiratory Commensal Bacteria to Beneficially Modulate the Lung Innate  
459 Immune Response Is a Strain Dependent Characteristic. *Microorganisms*. 2020;8:727.
- 460 38. Wen Z, Xie G, Zhou Q, Qiu C, Li J, Hu Q, et al. Distinct Nasopharyngeal and Oropharyngeal  
461 Microbiota of Children with Influenza A Virus Compared with Healthy Children. *BioMed*  
462 *Research International*. 2018;2018:1–9.
- 463 39. Zhou Y, Jackson D, Bacharier LB, Mauger D, Boushey H, Castro M, et al. The upper-airway  
464 microbiota and loss of asthma control among asthmatic children. *Nat Commun*.  
465 2019;10:5714.
- 466 40. Lappan R, S Peacock C. *Corynebacterium* and *Dolosigranulum*: future probiotic candidates  
467 for upper respiratory tract infections. *Microbiol Aust* [Internet]. 2019 [cited 2020 Sep 3];  
468 Available from: <http://microbiology.publish.csiro.au/?paper=MA19051>

469

470 **FIGURES**

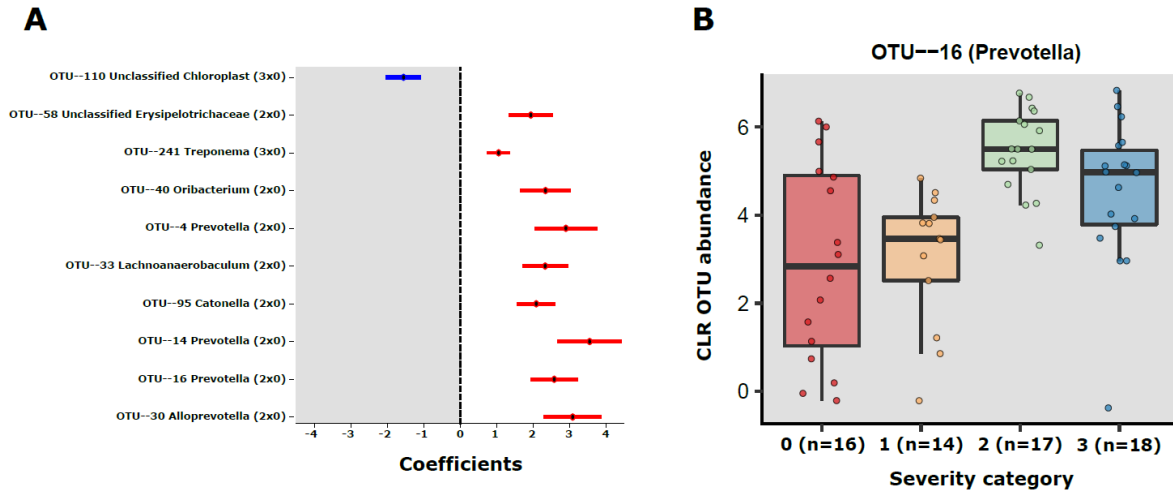

471

472 **Figure 1. A)** Error bar plot of the GLM coefficients interval for each OTU. The Y-axis shows the  
473 OTU number and Genus classification. The X-axis represents the CLR abundance. In red the  
474 positively associated OTUs and in blue the negatively associated OTUS. **B)** OTU 16 (*Prevotella*)

475 center log transformed (CLR) abundance in the severity groups 0-3.

476

477

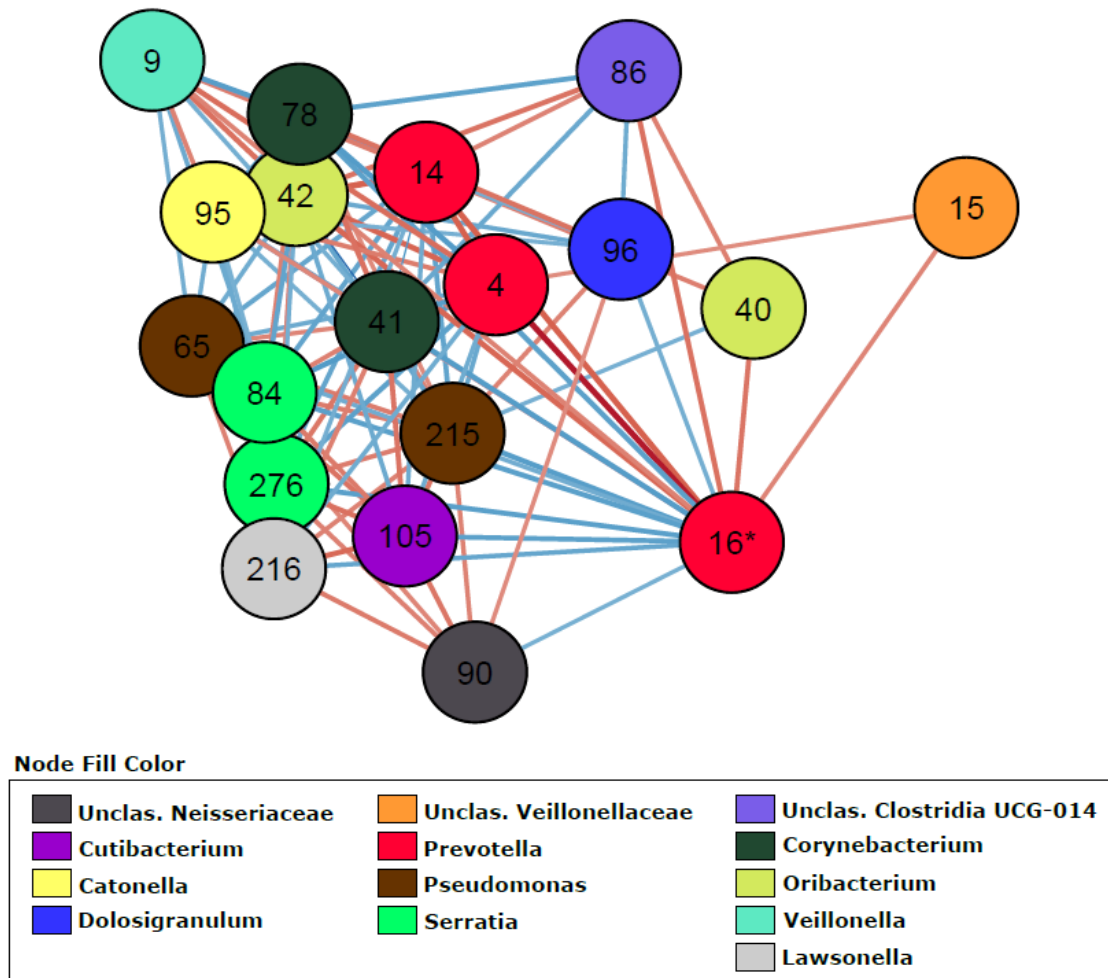

478

479 **Figure 2.** Co-abundance network (severity group 1) showing only first-degree neighbours of  
480 OTU 16 (*Prevotella* sp.). OTUs are represented by nodes and significant correlations by edges.  
481 Blue edges represent negative associations and red, positive associations. The colour of nodes  
482 was defined by the taxonomic classification of the OTU at Genus rank.

483

484

485

486

487

488

489 SUPPLEMENTARY MATERIAL

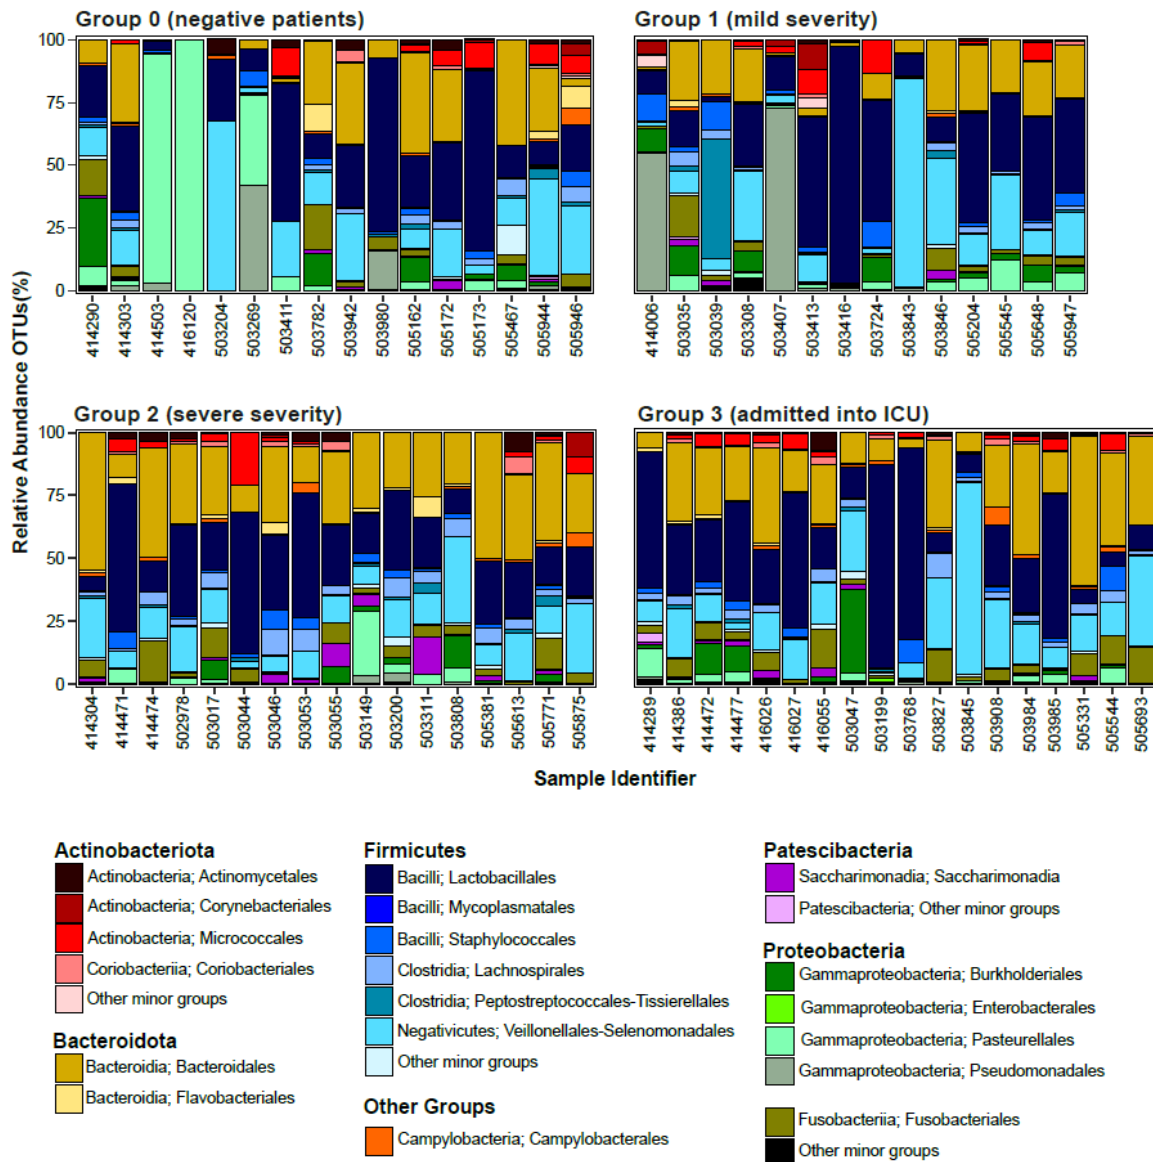

490

491 **Figure S1.** Relative abundance of bacterial populations, at genus level, in the microbiome of

492 patients within COVID-19 severity groups. Only microorganisms with a relative abundance

493 greater than 0.5% are shown in the legend.

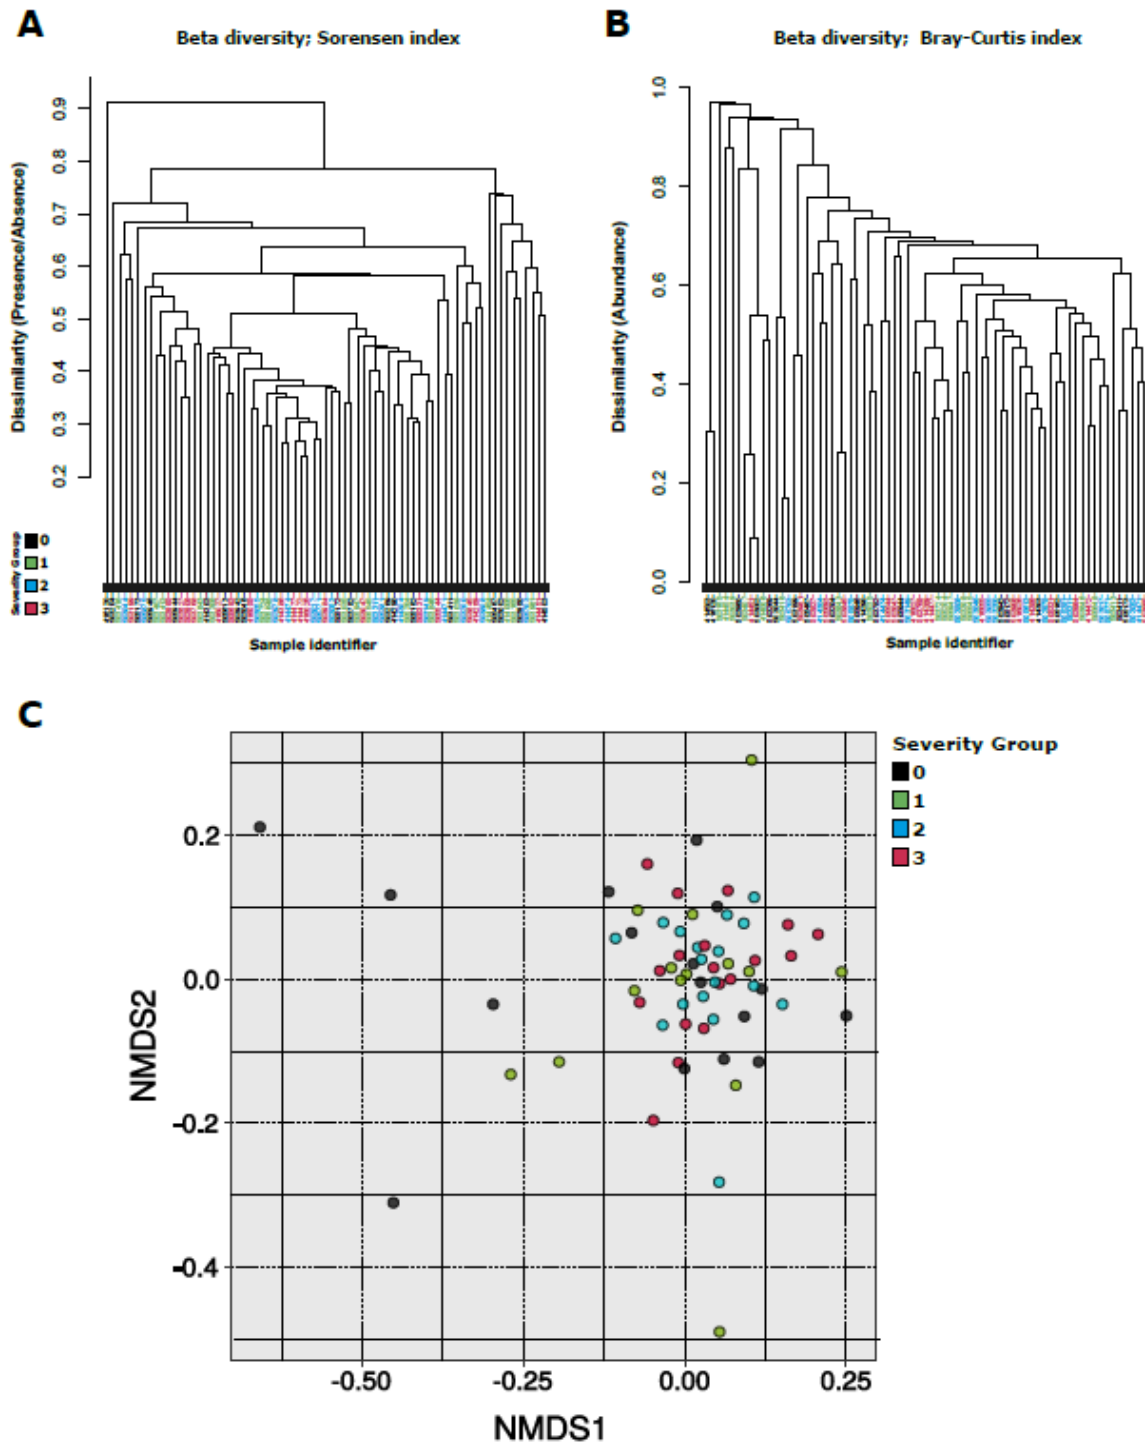

494

495 **Figure S2. Beta diversity.** Dendrogram based on A) Bray-Curtis dissimilarity and B) Sørensen

496 dissimilarity values. C) **Comparison of sample taxonomic profiles by severity group.**

497 Nonmetric multidimensional scaling was applied to determine the clustering patterns of

498 samples according to their OTU abundance patterns. Each dot represents a sample color

499 coded according to the severity group it belongs to. The closer the samples are, the more



500 similar was their OTU abundance composition. No clear clustering of samples by severity  
501 group was observed.

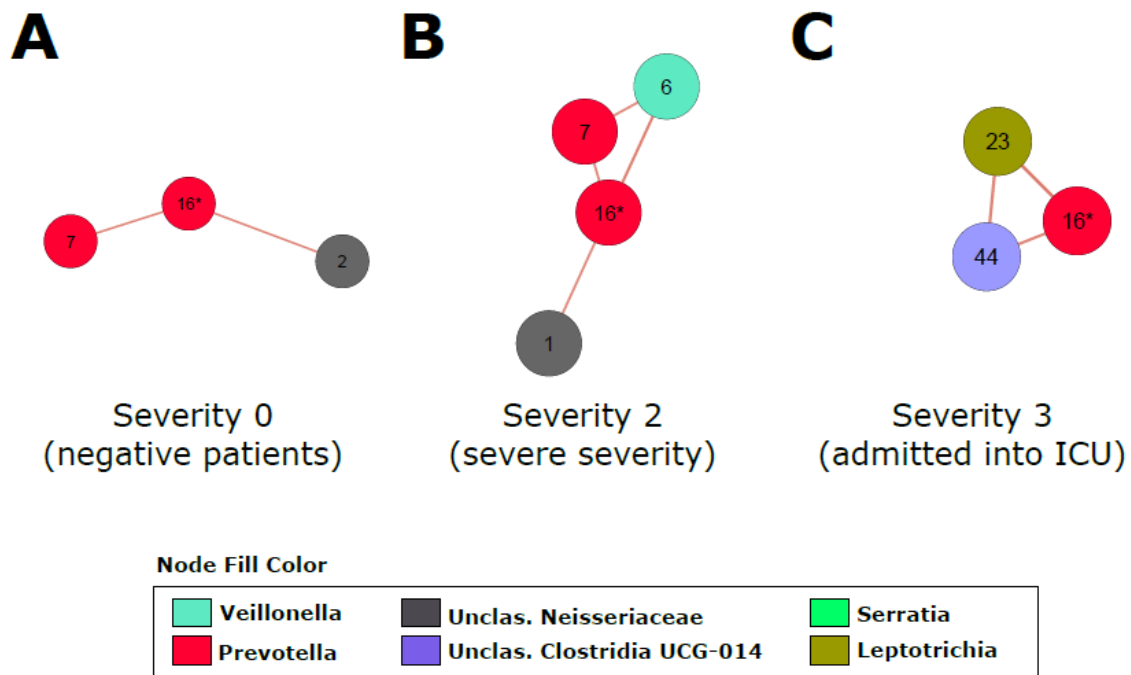

502  
503 **Figure S3.** Co-abundance network showing only first-degree neighbours of OTU 16 (*Prevotella*  
504 sp.). **A)** Severity group 0 **B)** Severity group 2 and **C)** Severity group 3.

505 **Table S1.** Clinical features of patients.

506 **Table S2.** OTUs taxonomic classification.

507 **Table S3.** OTUs showing approximately 70% of the differences in community composition  
508 between severity groups 1 and 3 (SIMPER).

509 **Table S4.** Maaslin2 results (GLM) for OTUs associations (q-value < 0.25) for both models.

510
